# Supplementary material for: Metal–organic framework-derived Cu nanoparticle binder-free monolithic electrodes with multiple support structures for electrocatalytic nitrate reduction to ammonia
Source: Royal Society of Chemistry journal article supplement (doi:10.1039/d3dt01412f), 2023-01-01
Supplement: d3dt01412f1.pdf [file d3dt01412f1.pdf]

## Supporting Information

### **Metal-organic frameworks derived Cu nanoparticles binder-free monolithic electrodes with multiple support structures for electrocatalytic nitrate reduction to ammonia**

Yingying Wang, § Yue Cao, § Yan Hai, Xinyan Wang, Senda Su, Wenming Ding,  
Zhenyu Liu, Xiaoman Li, and Min Luo\*

State Key Laboratory of High-efficiency Utilization of Coal and Green Chemical  
Engineering, School of Chemistry and Chemical Engineering, Ningxia University,  
Yinchuan, Ningxia 750021, P. R. China

§These authors contributed equally to this work.

**E-mail:** luominjy@nxu.edu.cn

# Contents

1. **Fig. S1.** (a) UV-Vis absorption curves of  $\text{NO}_3^-$ -N. (b) Calibration curve used to estimate the concentrations of  $\text{NO}_3^-$ -N.
2. **Fig. S2.** (a) UV-Vis absorption curves of  $\text{NO}_2^-$ -N. (b) Calibration curve used to estimate the concentrations of  $\text{NO}_2^-$ -N.
3. **Fig. S3.** (a) UV-Vis absorption curves of Nessler's reagent assays kept with different concentrations of  $\text{NH}_4^+$ -N. (b) Calibration curve used to estimate the concentrations of  $\text{NH}_4^+$ -N.
4. **Fig. S4.** (a) XRD patterns of the Cu-BTC, Cu-BTEC and Cu-BDC. (b) CV curves of Cu-BTC in the reduction process. (c) High-resolution XPS spectra for Cu 2p of the Cu-BTC-Cu, Cu-BTEC-Cu, and Cu-BDC-Cu.
5. **Fig. S5.** SEM images of the (a, d) Cu-BTC-Cu, (b, e) Cu-BTEC-Cu, and (c, f) Cu-BDC-Cu.
6. **Fig. S6.** Experimental equipment schematic diagram for electrocatalytic NRA
7. **Fig. S7.** (a) LSV curves of Cu-BTC-Cu, Cu-BTEC-Cu and Cu-BDC-Cu at 0.05 M  $\text{Na}_2\text{SO}_4$  and 0.05 M  $\text{Na}_2\text{SO}_4$ +750 mg/L  $\text{NO}_3^-$ -N.
8. **Fig. S8.** CV curves of (a) Cu-BTC-Cu, (b) Cu-BTEC-Cu, and (c) Cu-BDC-Cu under different scan rates from 20 to 120  $\text{mV S}^{-1}$ .
9. **Fig. S9.** CV curves of (a) Cu-BTC-Cu-5, (b) Cu-BTEC-Cu-15, and (c) Cu-BDC-Cu-30 under different scan rates from 20 to 100  $\text{mV S}^{-1}$ . (d) The fitted linear relationship between current density and the scan rate for the Cu-BTC-Cu-5, Cu-BTEC-Cu-15, and Cu-BDC-Cu-30.
10. **Fig. S10.** Characterizations of the Cu-BTC-Cu participates in electrocatalytic nitrate reduction before and after (Cu-BTC-Cu-Before and Cu-BTC-Cu-After): (a) High-resolution XPS spectra for Cu 2p, (b) XRD patterns, and (c, d) SEM images.
11. **Figure S11.** The  $\text{NH}_4^+$  detection of (a) standard spectra and (b) fitting curve by ion chromatography
12. **Figure S12.**  $\text{NH}_3$  yields and FE of the Cu-BTC-Cu at different potentials by the Nessler's color reagent and ion chromatography.

13. **Figure S13.** NH<sub>3</sub> yields and FE of the Cu-BTC-Cu at different concentrations of NO<sub>3</sub><sup>-</sup>-N.
14. **Figure S14.** NH<sub>3</sub> yields and FE of the Cu-BTC-Cu at two-electrode and three-electrode system.
15. **Figure S15.** The electrochemical impedance spectroscopy of Cu-BTC-Cu, Cu-BTEC-Cu, and Cu-BDC-Cu.
16. **Table S1.** Comparison of ammonia synthesis from nitrate reduction over Cu-BTC-Cu and other reported catalysts.

# 1. Experimental section

## 1.1 Determination of $\text{NO}_3^-$ -N

First, remove 1 mL electrolyte from the electrolytic cell and dilute it to 50 mL to the detection range. Afterwards, 1 mL 1 M HCl and 1 mL 0.8 wt%  $\text{H}_3\text{NO}_3\text{S}$  solution were added to the above solution. The absorbance was detected by UV-Vis spectrophotometry after 60 minutes at a wavelength of 220 nm and 275 nm. The final absorbance of  $\text{NO}_3^-$  can be calculated as following:  $A = A_{220 \text{ nm}} - 2A_{275 \text{ nm}}$ . The calibration curve can be acquired through different concentrations of  $\text{KNO}_3$  solutions and corresponding absorbance. The fitting curve ( $y = 0.23994x + 0.02701$ ,  $R^2 = 0.9991$ ) exhibits great linear relation of absorbance value with  $\text{NO}_3^-$ -N concentration.

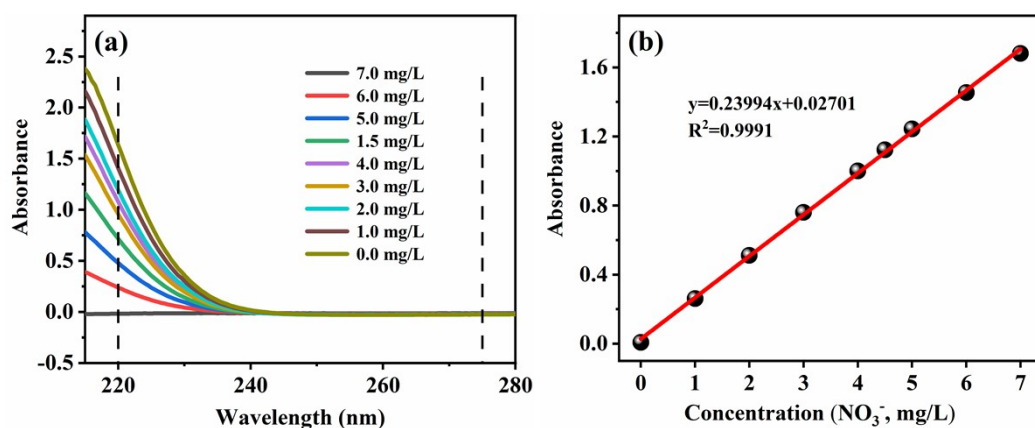

**Figure S1.** (a) UV-Vis absorption curves of  $\text{NO}_3^-$ -N. (b) Calibration curve used to estimate the concentrations of  $\text{NO}_3^-$ -N.

## 1.2 Determination of $\text{NO}_2^-$ -N

A mixture of p-aminobenzenesulfonamide (5 g), HCl (50 mL), and ultrapure water (450 mL) were used as a color reagent. 1 mL electrolyte was extracted from the electrolytic cell and diluted to 100 mL to detection range. 1 mL mixed solution of p-aminobenzenesulfonamide and HCl and 1 mL N-(1-Naphthyl) ethylenediamine dihydrochloride (1 g/L) were added into the above solution and mixed uniformly. After standing at room temperature for 60 min, the absorbance was recorded at a wavelength of 540 nm. The concentration-absorbance curve was calibrated using the standard  $\text{KNO}_2$  with different  $\text{NO}_2^-$ -N concentrations. The fitting curve ( $y = 3.4212x + 0.0001026$ ,  $R^2 = 0.9998$ ) exhibits great linear relation of absorbance value with  $\text{NO}_2^-$ -N concentration.

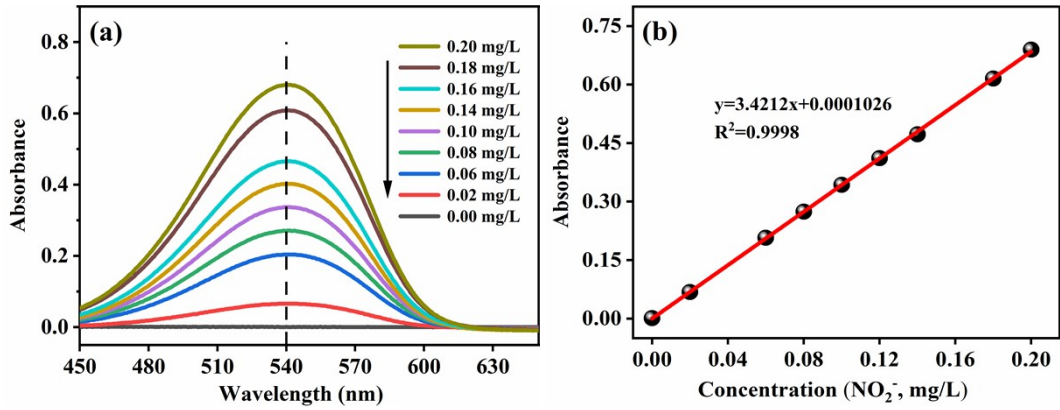

**Figure S2.** (a) UV-Vis absorption curves of  $\text{NO}_2^-$ -N. (b) Calibration curve used to estimate the concentrations of  $\text{NO}_2^-$ -N.

### 1.3 Determination of $\text{NH}_3$ -N

The Nessler's reagent was employed as the color reagent for the determination of  $\text{NH}_3$ -N. Firstly, 1 mL electrolyte was extracted from the cathodic chamber and diluted to 100 mL to detection range. Then, 1 mL of potassium sodium tartrate solution and 1 mL Nessler's reagent were subsequently added into the above solution and mixed uniformly. After standing at room temperature for 20 min, the absorbance was recorded at a wavelength of 420 nm. The concentration-absorbance curve was calibrated using the standard  $\text{NH}_4\text{Cl}$  with different  $\text{NH}_4^+$ -N concentrations. The fitting curve ( $y = 0.1521x + 0.010$ ,  $R^2 = 0.999$ ) exhibits great linear relation of absorbance value with  $\text{NO}_4^-$ -N concentration.

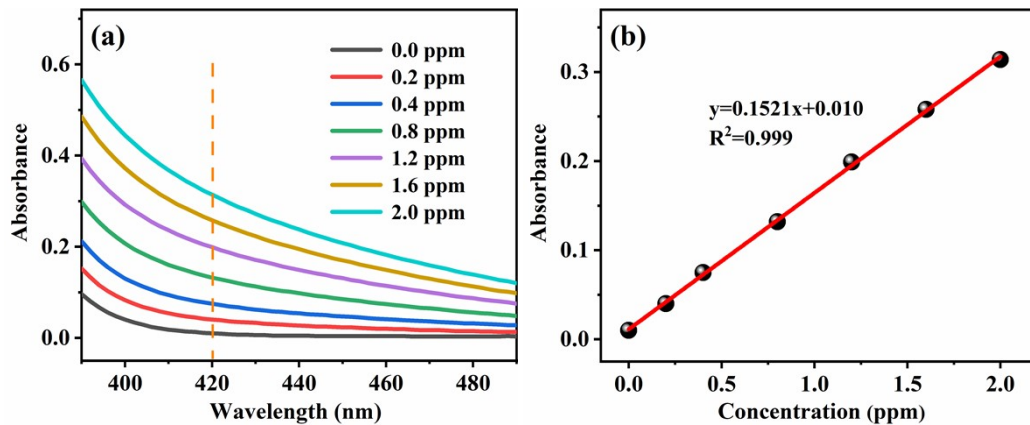

**Figure S3.** (a) UV-Vis absorption curves of Nessler's reagent assays kept with different concentrations of  $\text{NH}_4^+$ -N. (b) Calibration curve used to estimate the concentrations of  $\text{NH}_4^+$ -N.

### 1.4 Calculations of FE, $\text{NH}_3$ yield, selectivity and conversion rate

$$FE = (8 \times F \times C_{\text{NH}_3} \times V) \div (M_{\text{NH}_3} \times Q) \times 100\%$$

$$\text{NH}_3 \text{ yield} = (C_{\text{NH}_3} \times V) \div (M_{\text{NH}_3} \times t \times S)$$

$$S_{NH_3} = C_{NH_3} \div \Delta C_{NO_3^-} \times 100\%$$

$$Conversion = \Delta C_{NO_3^-} \div C_0 \times 100\%$$

Where  $F$  is the Faradic constant ( $96485 \text{ C mol}^{-1}$ ),  $C_{NH_3}$  is the measured  $NH_3$  concentration,  $V$  is the volume of electrolyte in the anode compartment (120 mL),  $M_{NH_3}$  is the molar mass of  $NH_3$ ,  $Q$  is the total quantity of applied electricity,  $t$  is the electrolysis time (1 h),  $S$  is the loaded area of catalyst ( $1 \text{ cm}^2$ ),  $C_0$  is the initial concentration of  $NO_3^-$ , and  $\Delta C_{NO_3^-}$  is the concentration difference of  $NO_3^-$  before and after electrolysis.

### 1.5 Electrochemical *in-situ* ATR-FTIR test

The glassy carbon electrode supported by catalyst was used as the working electrode. 0.1 M  $Na_2SO_4$  with 50 ppm  $NO_3^-$ -N was adopted as the electrolyte. The *in-situ* ATR-FTIR spectra were collected during LSV test from 0 to  $-1.5 \text{ V}$  vs.  $Ag/AgCl$  with a scan rate of  $2 \text{ mV/s}$ . Each reflectance spectrum was collected with a time resolution of 60 s at a spectral resolution of  $4 \text{ cm}^{-1}$ . Then, all of the spectra were transformed into absorbance spectra.

## 2. Result and discussion

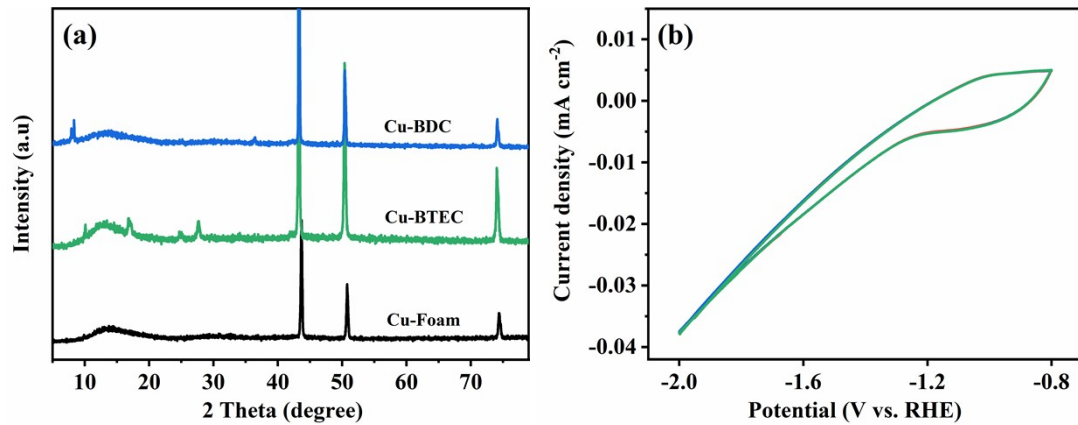

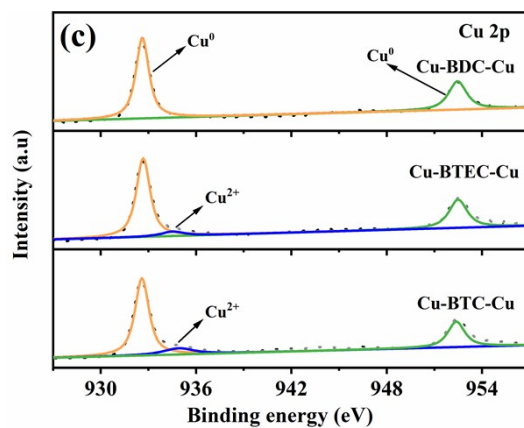

**Figure S4.** (a) XRD patterns of the Cu-BTC, Cu-BTEC and Cu-BDC. (b) CV curves of Cu-BTC in the reduction process during the last few cycles. (c) High-resolution XPS spectra for Cu 2p of the Cu-BTC-Cu, Cu-BTEC-Cu, and Cu-BDC-Cu.

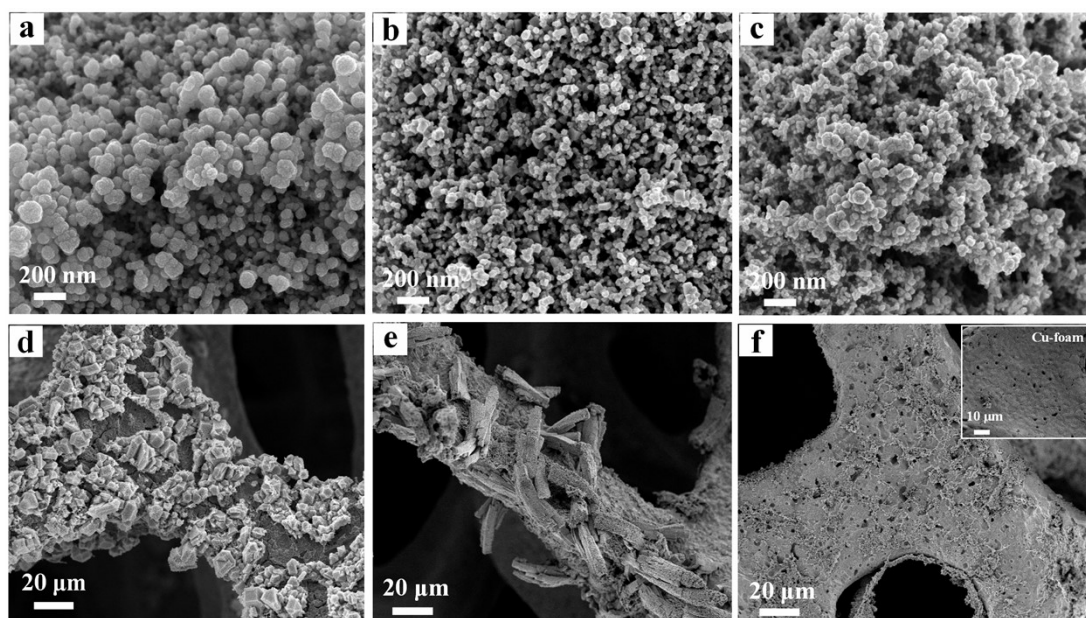

**Figure S5.** SEM images of the (a, d) Cu-BTC-Cu, (b, e) Cu-BTEC-Cu, and (c, f) Cu-BDC-Cu.

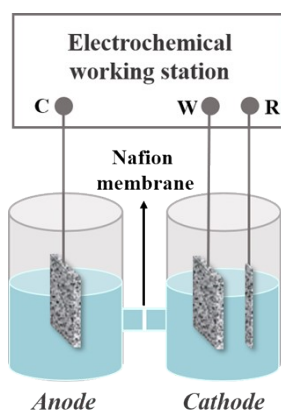

**Figure S6.** Experimental equipment schematic diagram for electrocatalytic NRA

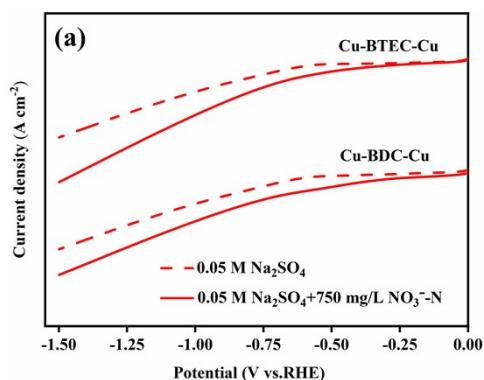

**Figure S7.** (a) LSV curves of Cu-BTEC-Cu and Cu-BDC-Cu at 0.05 M  $\text{Na}_2\text{SO}_4$  and 0.05 M  $\text{Na}_2\text{SO}_4+750 \text{ mg/L NO}_3^-$ -N.

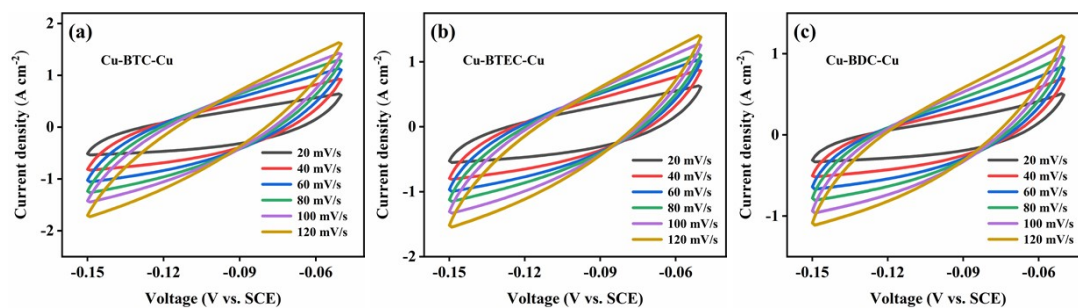

**Figure S8.** CV curves of (a) Cu-BTC-Cu, (b) Cu-BTEC-Cu, and (c) Cu-BDC-Cu under different scan rates from 20 to  $120 \text{ mV S}^{-1}$

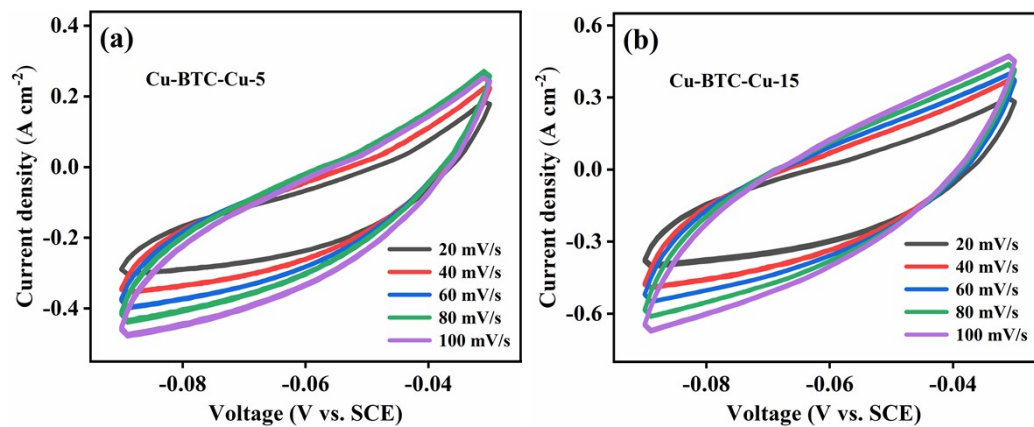



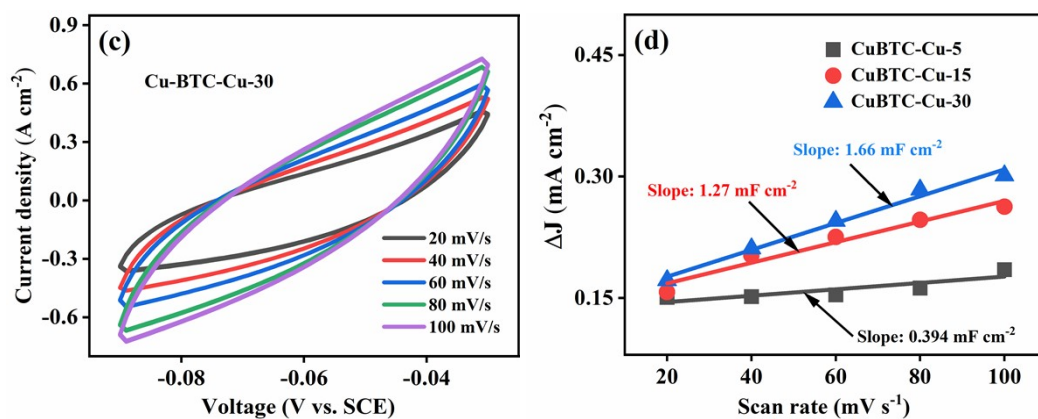

**Figure S9.** CV curves of (a) Cu-BTC-Cu-5, (b) Cu-BTEC-Cu-15, and (c) Cu-BDC-Cu-30 under different scan rates from 20 to 100 mV S<sup>-1</sup>. (d) The fitted linear relationship between current density and the scan rate for the Cu-BTC-Cu-5, Cu-BTEC-Cu-15, and Cu-BDC-Cu-30.

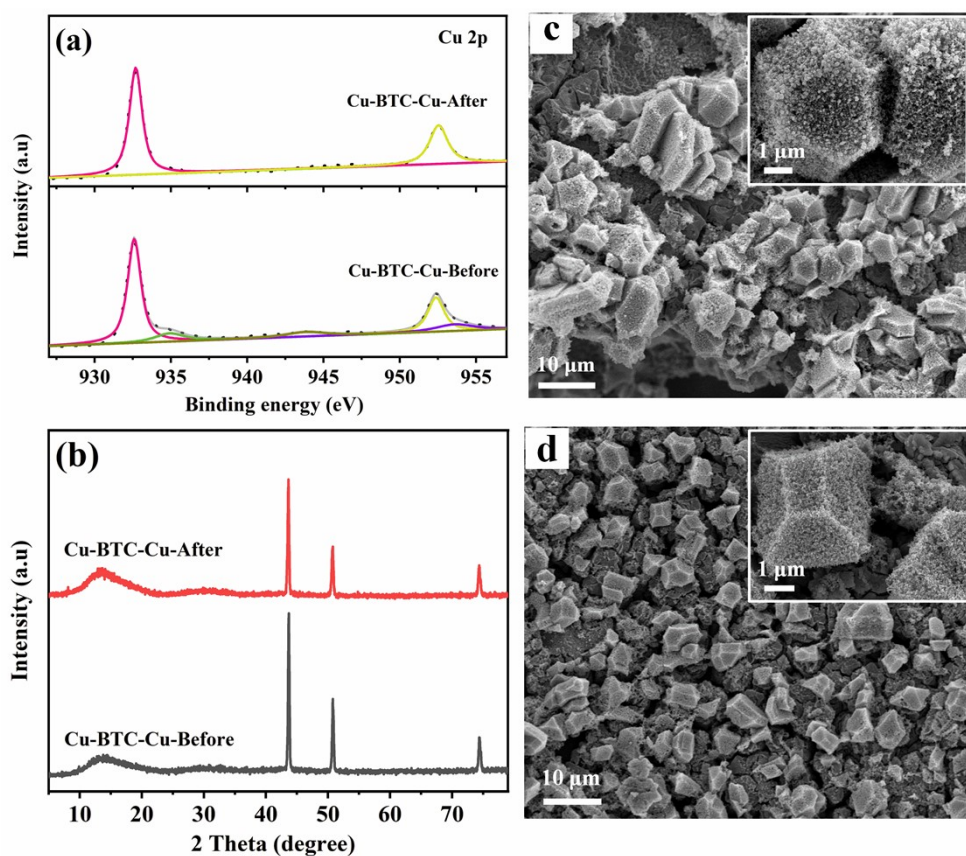

**Figure S10.** Characterizations of the Cu-BTC-Cu participates in electrocatalytic nitrate reduction before and after (Cu-BTC-Cu-Before and Cu-BTC-Cu-After): (a) High-resolution XPS spectra for Cu 2p, (b) XRD patterns, and (c, d) SEM images.

The standard curve is prepared by external standard method using NH<sub>4</sub>Cl as standard solution. (Figure S11 a and b)

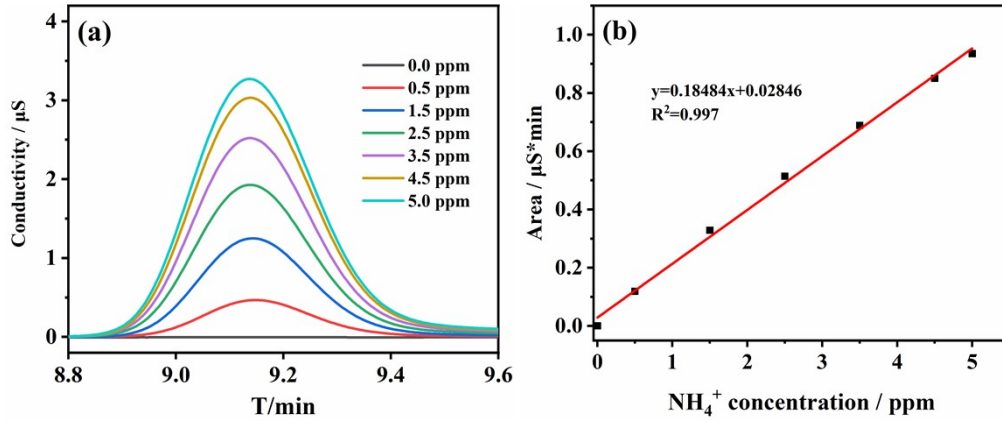

Figure S11. The  $\text{NH}_4^+$  detection of (a) standard spectra and (b) fitting curve by ion chromatography.

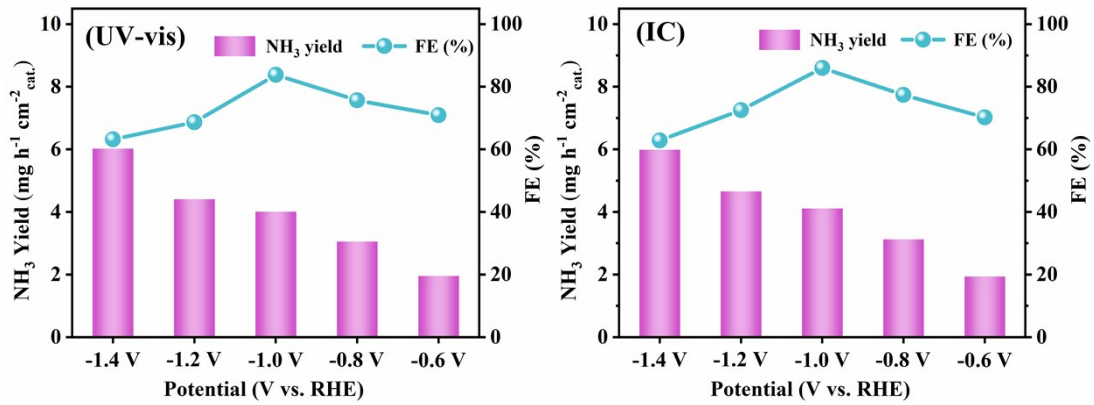

Figure S12.  $\text{NH}_3$  yields and FE of the Cu-BTC-Cu at different potentials by the Nessler's color reagent and ion chromatography.

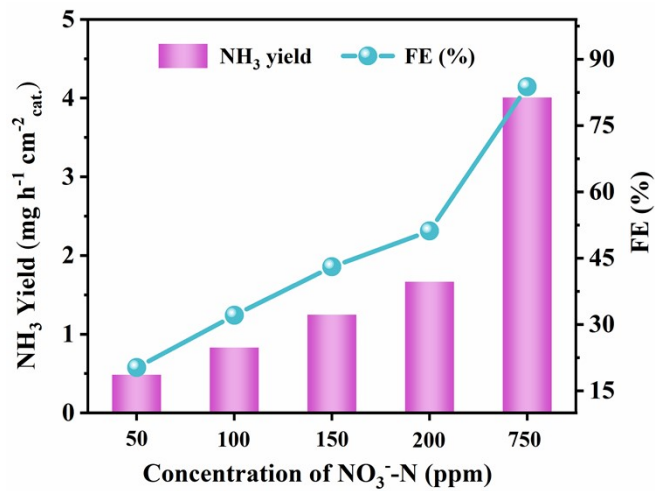

Figure S13.  $\text{NH}_3$  yields and FE of the Cu-BTC-Cu at different concentrations of  $\text{NO}_3^-$ -N.

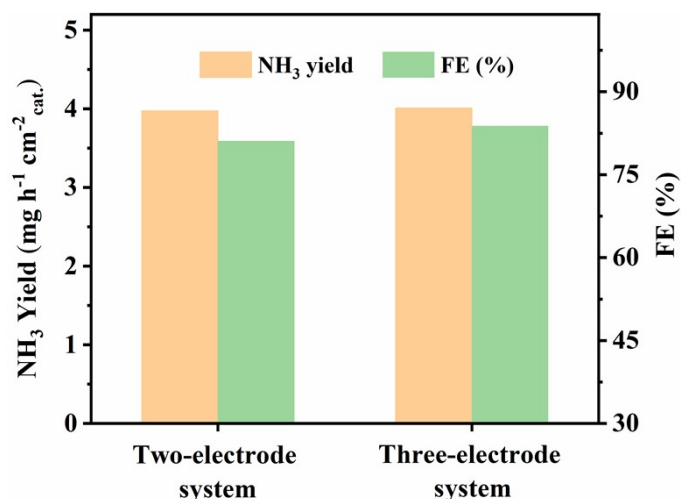

**Figure S14.** NH<sub>3</sub> yields and FE of the Cu-BTC-Cu at two-electrode and three-electrode system.

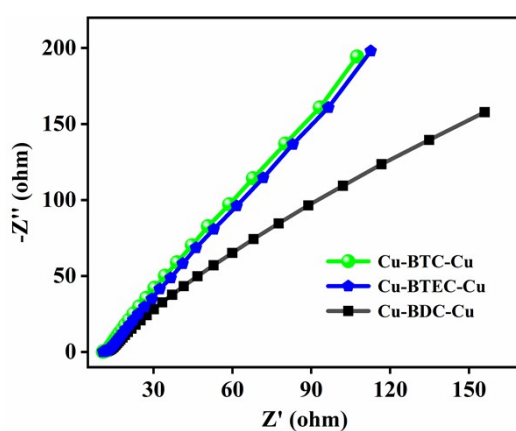

**Figure S15.** The electrochemical impedance spectroscopy of Cu-BTC-Cu, Cu-BTEC-Cu, and Cu-BDC-Cu

**Table S1** Comparison of ammonia synthesis from nitrate reduction over Cu-BTC-Cu and other reported catalysts.

| Catalyst              | Electrolyte                                                                                    | NH <sub>3</sub> yield<br>( $\mu\text{g h}^{-1} \text{cm}^{-2}$ ) | Ref.      |
|-----------------------|------------------------------------------------------------------------------------------------|------------------------------------------------------------------|-----------|
| Cu-BTC-Cu             | 0.05 M K <sub>2</sub> SO <sub>4</sub> /750 mg L <sup>-1</sup> NO <sub>3</sub> <sup>-</sup> -N  | 4009.3                                                           | This work |
| Cu@Th-BPYDC           | 1 M KOH/1400 mg L <sup>-1</sup> NO <sub>3</sub> <sup>-</sup> -N                                | 3830.1                                                           | 1         |
| BCN-Cu 10             | 0.1 M KOH/1400 mg L <sup>-1</sup> NO <sub>3</sub> <sup>-</sup> -N                              | 1900.07                                                          | 2         |
| FeS <sub>2</sub> /RGO | 0.5 M Na <sub>2</sub> SO <sub>4</sub> /1400 mg L <sup>-1</sup> NO <sub>3</sub> <sup>-</sup> -N | 2320                                                             | 3         |
| WSe <sub>2-x</sub>    | 0.5 M Na <sub>2</sub> SO <sub>4</sub> /1400 mg L <sup>-1</sup> NO <sub>3</sub> <sup>-</sup> -N | 2420                                                             | 4         |
| MnO <sub>2-x</sub>    | 0.1 M Na <sub>2</sub> SO <sub>4</sub> /1400 mg L <sup>-1</sup> NO <sub>3</sub> <sup>-</sup> -N | 3340                                                             | 5         |
| BCN@Ni                | 0.1 M KOH/1400 mg L <sup>-1</sup> NO <sub>3</sub> <sup>-</sup> -N                              | 2320.2                                                           | 6         |

---

|                                                 |                                                                                                |        |    |
|-------------------------------------------------|------------------------------------------------------------------------------------------------|--------|----|
| Pd/TiO <sub>2</sub>                             | 1 M LiCl/3500 mg L <sup>-1</sup> NO <sub>3</sub> <sup>-</sup> -N                               | 1120   | 7  |
| BP                                              | 0.5 M Na <sub>2</sub> SO <sub>4</sub> /1400 mg L <sup>-1</sup> NO <sub>3</sub> <sup>-</sup> -N | 3100   | 8  |
| FeOOH                                           | 0.1 M PBS/0.1 M NaNO <sub>3</sub>                                                              | 2419   | 9  |
| Co <sub>3</sub> O <sub>4</sub> -Mn <sub>2</sub> | 0.5 M K <sub>2</sub> SO <sub>4</sub> /1400 mg L <sup>-1</sup> NO <sub>3</sub> <sup>-</sup> -N  | 3500   | 10 |
| Fe-MoS <sub>2</sub>                             | 0.1 M Na <sub>2</sub> SO <sub>4</sub> +0.1 M NaOH/0.1 M NaNO <sub>3</sub>                      | 510    | 11 |
| MoO <sub>2</sub> -C NBF                         | 1 M KOH/1400 mg L <sup>-1</sup> NO <sub>3</sub> <sup>-</sup> -N                                | 1857.7 | 12 |

---

## References:

- (1) Gao, Z.; Lai, Y.; Tao, Y.; Xiao, L.; Zhang, L.; Luo, F. Constructing Well-Defined and Robust Th-MOF-Supported Single-Site Copper for Production and Storage of Ammonia from Electroreduction of Nitrate. *ACS Cent Sci* **2021**, *7* (6), 1066-1072. DOI: 10.1021/acscentsci.1c00370.
- (2) Zhao, X.; Jia, X.; He, Y.; Zhang, H.; Zhou, X.; Zhang, H.; Zhang, S.; Dong, Y.; Hu, X.; Kuklin, A. V.; et al. Two-dimensional BCN matrix inlaid with single-atom-Cu driven electrochemical nitrate reduction reaction to achieve sustainable industrial-grade production of ammonia. *Applied Materials Today* **2021**, *25*. DOI: 10.1016/j.apmt.2021.101206.
- (3) Zhang, N.; Zhang, G.; Tian, Y.; Tang, Y.; Chu, K. FeS<sub>2</sub> nanoparticles on reduced graphene oxide: an efficient electrocatalyst for nitrate electroreduction to ammonia. *Dalton Trans* **2022**, *51* (44), 16805-16810. DOI: 10.1039/d2dt02991j.
- (4) Shen, P.; Wang, G.; Chen, K.; Kang, J.; Ma, D.; Chu, K. Selenium-vacancy-rich WSe<sub>2</sub> for nitrate electroreduction to ammonia. *J Colloid Interface Sci* **2023**, *629* (Pt A), 563-570. DOI: 10.1016/j.jcis.2022.09.012.
- (5) Wang, G.; Shen, P.; Luo, Y.; Li, X.; Li, X.; Chu, K. A vacancy engineered MnO<sub>2-x</sub> electrocatalyst promotes nitrate electroreduction to ammonia. *Dalton Trans* **2022**, *51* (24), 9206-9212. DOI: 10.1039/d2dt01431a.
- (6) Zhao, X.; Zhu, Z.; He, Y.; Zhang, H.; Zhou, X.; Hu, W.; Li, M.; Zhang, S.; Dong, Y.; Hu, X.; et al. Simultaneous anchoring of Ni nanoparticles and single-atom Ni on BCN matrix promotes efficient conversion of nitrate in water into high-value-added ammonia. *Chemical Engineering Journal* **2022**, *433*. DOI: 10.1016/j.cej.2021.133190.
- (7) Guo, Y.; Zhang, R.; Zhang, S.; Zhao, Y.; Yang, Q.; Huang, Z.; Dong, B.; Zhi, C. Pd doping-weakened intermediate adsorption to promote electrocatalytic nitrate reduction on TiO<sub>2</sub> nanoarrays for ammonia production and energy supply with zinc–nitrate batteries. *Energy & Environmental Science* **2021**, *14* (7), 3938-3944. DOI: 10.1039/d1ee00806d.
- (8) Zhang, N.; Zhang, G.; Tian, Y.; Guo, Y.; Chu, K. Boron phosphide as an efficient metal-free catalyst for nitrate electroreduction to ammonia. *Dalton Trans* **2023**, *52* (14), 4290-4295. DOI: 10.1039/d3dt00551h.
- (9) Liu, Q.; Liu, Q.; Xie, L.; Ji, Y.; Li, T.; Zhang, B.; Li, N.; Tang, B.; Liu, Y.; Gao, S.; et al. High-Performance Electrochemical Nitrate Reduction to Ammonia under Ambient Conditions Using a FeOOH Nanorod Catalyst. *ACS Appl Mater Interfaces* **2022**, *14* (15), 17312-17318. DOI: 10.1021/acsaami.2c00436.
- (10) Liu, D.; Qiao, L.; Chen, Y.; Zhou, P.; Feng, J.; Leong, C. C.; Ng, K. W.; Peng, S.; Wang, S.; Ip, W. F.; et al. Electrocatalytic reduction of nitrate to ammonia on low-cost manganese-incorporated Co<sub>3</sub>O<sub>4</sub> nanotubes. *Applied Catalysis B: Environmental* **2023**, *324*. DOI:

10.1016/j.apcatb.2022.122293.

- (11) Li, J.; Zhang, Y.; Liu, C.; Zheng, L.; Petit, E.; Qi, K.; Zhang, Y.; Wu, H.; Wang, W.; Tiberj, A.; et al. 3.4% Solar-to-Ammonia Efficiency from Nitrate Using Fe Single Atomic Catalyst Supported on MoS<sub>2</sub> Nanosheets. *Advanced Functional Materials* **2021**, 32 (18). DOI: 10.1002/adfm.202108316.
- (12) Yan, J.; Liu, P.; Li, J.; Huang, H.; Song, W. Effect of valence state on electrochemical nitrate reduction to ammonia in molybdenum catalysts. *Chemical Engineering Journal* **2023**, 459. DOI: 10.1016/j.cej.2023.141601.
